# Supplementary material for: Identification and Functional Characterization of Two Noncoding RNAs Transcribed from Putative Active Enhancers in Hepatocellular Carcinoma
Source: PubMed Central journal article supplement — Mol Cells. 2021 Sep 27;44(9):658–69. doi: 10.14348/molcells.2021.0173 (PMC8490203; doi:10.14348/molcells.2021.0173), 2021-09-27
Supplement: molce-44-9-658-Supple1.pdf [file molce-44-9-658-Supple1.pdf]

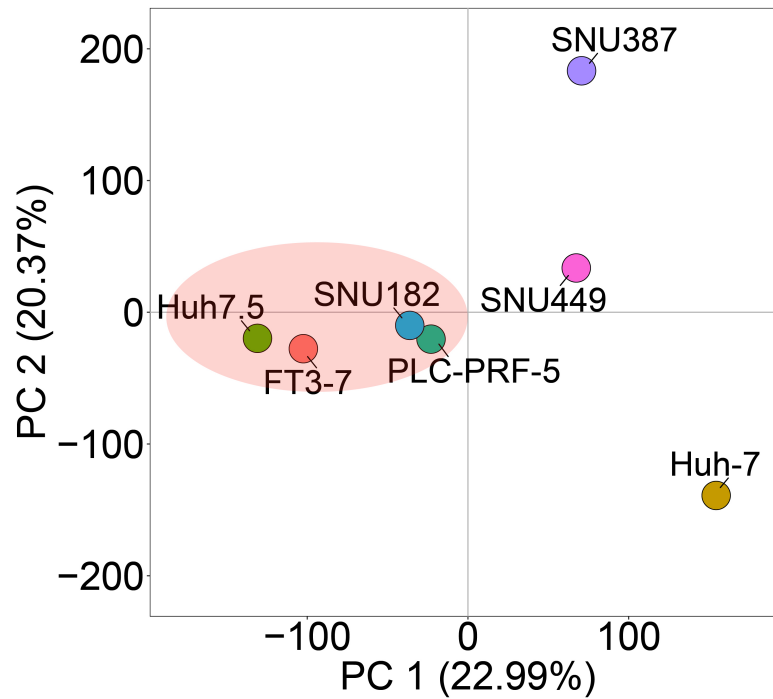

**Supplementary Fig. S1. PCA of RNA-seq data derived from seven hepatocellular cell lines.** The four cell lines that were used for identifying eRNAs are shaded with pink ellipses and were differentiated from the other three cell lines by PC1.

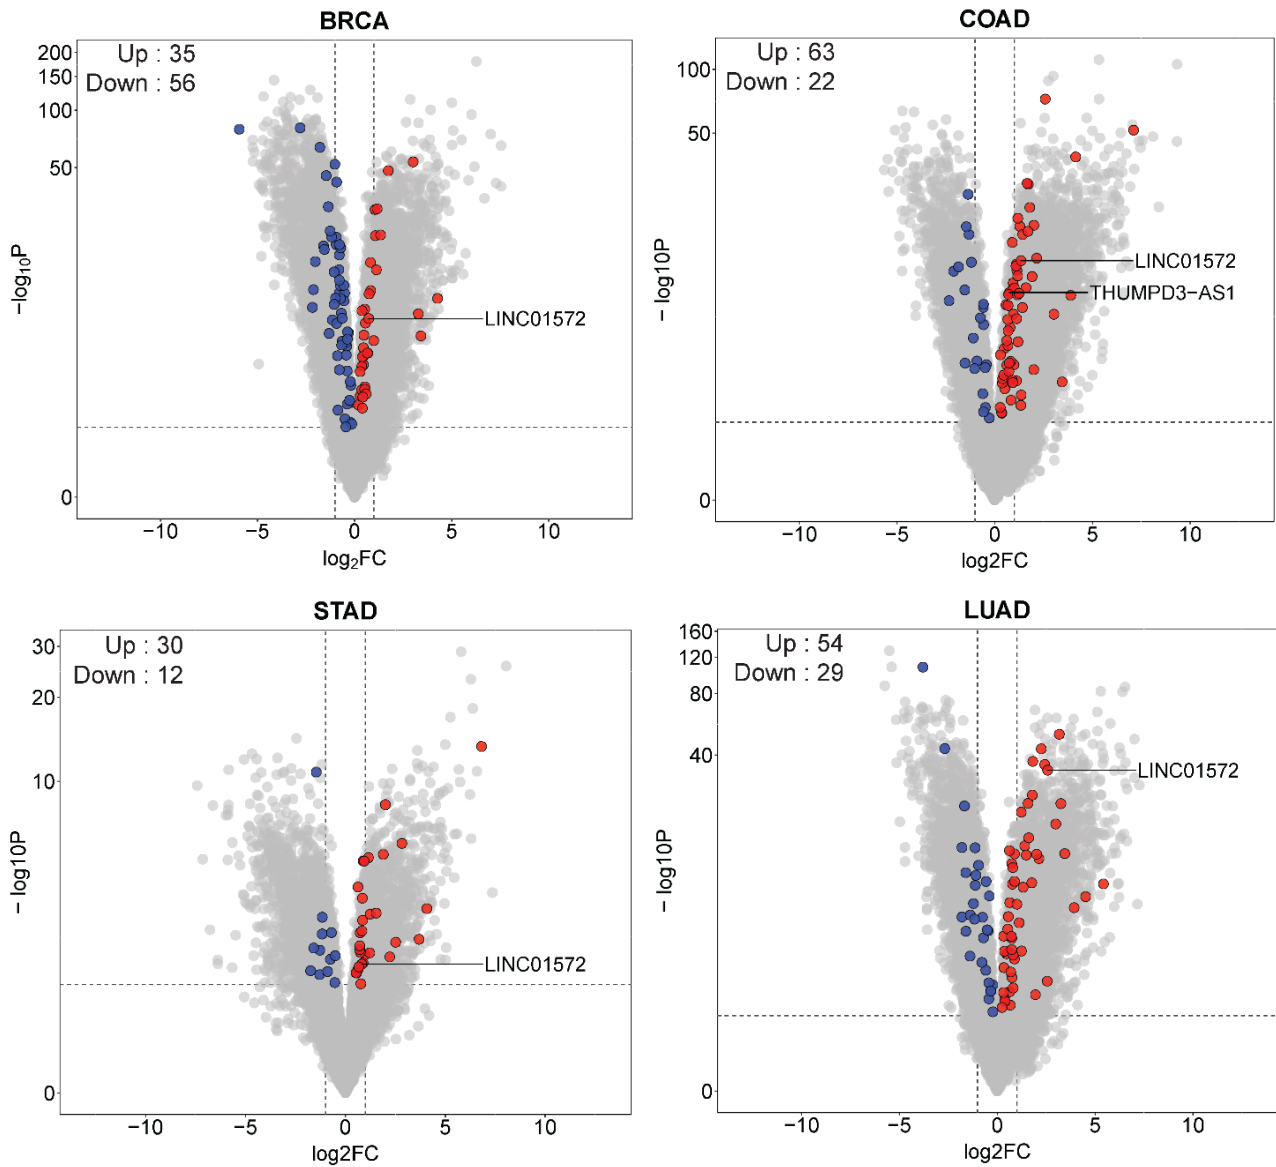

**Supplementary Fig. S2. Volcano plots of the DEGs identified from four different TCGA cancer datasets.** Four different TCGA RNA-seq datasets were used to identify DEGs by comparing gene expression between normal and tumor samples  $P < 0.05$ . Only upregulated (red) and downregulated (blue) eRNAs are depicted accordingly in each cancer.

**A**

**THUMPD3-AS1 (NR\_027007.3)**

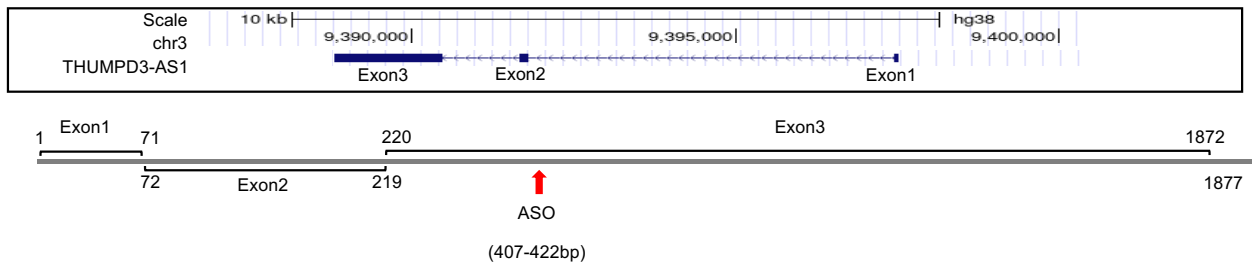

**B**

**LINC01572 (NR\_159370.1)**

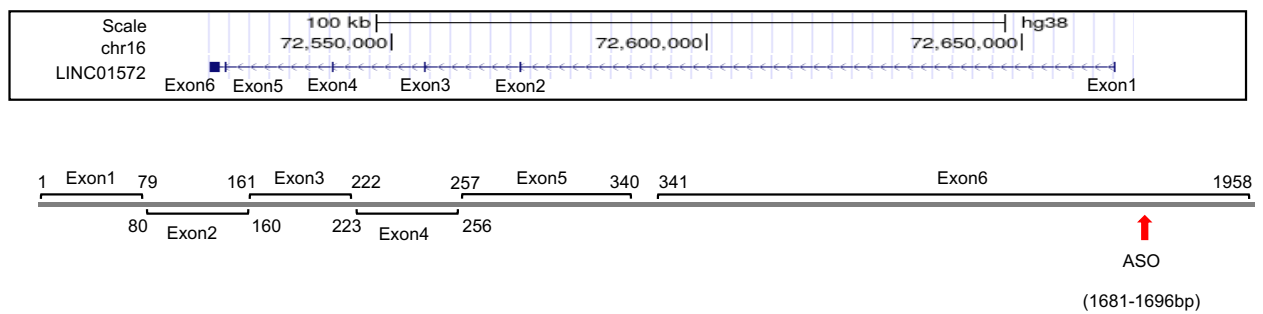

**Supplementary Fig. S3. Genetic structure of the two eRNAs and the ASO target location.** (A) The human THUMPD3-AS1 gene is located on chromosome 3 and consists of 3 exons. The ASO for THUMPD3-AS1 targeted exon 3. (B) The human LINC01572 gene is located on chromosome 16 and consists of 6 exons. The ASO for LINC01572 targeted exon 6.

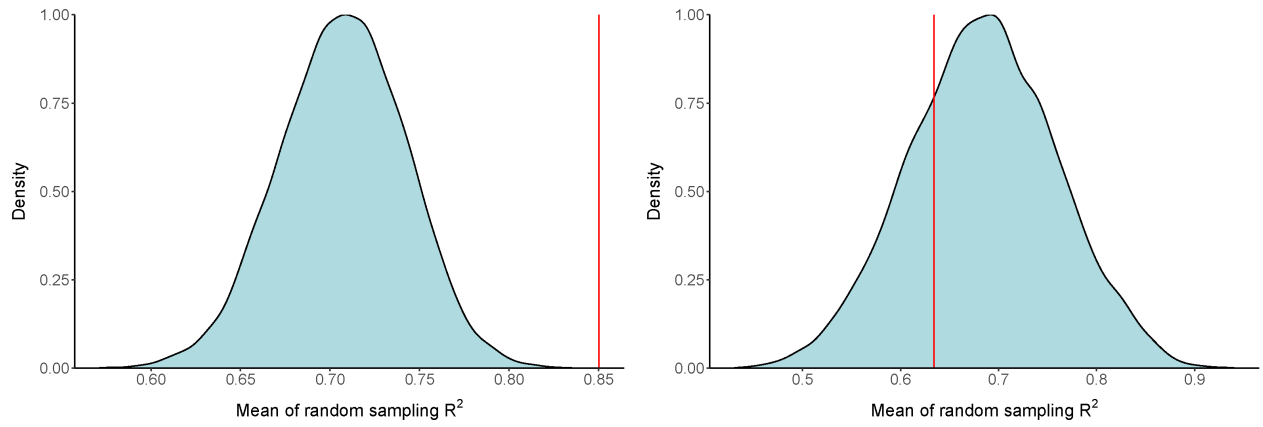

**Supplementary Fig. S4. Permutation analysis of  $R^2$  values for randomly chosen non-TAD genes.** Density plot of the  $R^2$  values calculated for randomly chosen non-TAD genes. The  $R^2$  values were estimated during 10,000 iterations for the thirteen randomly chosen genes, i.e., the number of genes among the 343 genes correlated with THUMP3-AS1 located within the THUMP3-AS1 TAD (A), and three randomly chosen genes, i.e., the number of genes among the 400 genes correlated with LINC01572 located within the same TAD (B). The red bar in the plot indicates the observed average  $R^2$  value calculated from the thirteen (A) and three (B) TAD genes.

**Supplementary Table S1.** RNA-seq outputs from seven hepatocellular cell lines

|                           | FT3-7       | Huh-7       | Huh7.5      | PLC-PRF-5   | SNU182      | SNU387      | SNU449      |
|---------------------------|-------------|-------------|-------------|-------------|-------------|-------------|-------------|
| Total reads               | 116,336,364 | 109,035,592 | 125,101,533 | 122,253,797 | 105,745,982 | 132,855,367 | 132,467,381 |
| Reads after trimming      | 109,923,572 | 99,643,491  | 123,090,118 | 119,754,251 | 100,834,914 | 130,404,876 | 130,017,094 |
| Overall read mapping rate | 95.8%       | 90.2%       | 97.2%       | 96.9%       | 96.9%       | 97.2%       | 97.6%       |

**Supplementary Table S2.** ChIP-seq outputs from seven hepatocellular cell lines

|                             | FT3-7      | Huh-7      | Huh7.5     | PLC-PRF-5  | SNU182     | SNU387     | SNU449     |
|-----------------------------|------------|------------|------------|------------|------------|------------|------------|
| <b>Total reads</b>          |            |            |            |            |            |            |            |
| H3K27ac                     | 67,930,429 | 64,361,750 | 52,085,159 | 53,971,505 | 61,707,090 | 54,072,895 | 63,531,281 |
| H34me1                      | 80,650,123 | 50,464,428 | 52,233,147 | 65,339,269 | 72,273,443 | 54,795,761 | 60,515,029 |
| H3                          | 66,844,506 | 57,114,371 | 50,329,409 | 51,930,903 | 51,920,739 | 49,717,762 | 54,968,044 |
| <b>Reads after trimming</b> |            |            |            |            |            |            |            |
| H3K27ac                     | 67,704,666 | 64,237,526 | 50,802,457 | 52,606,137 | 61,495,742 | 52,704,473 | 61,956,541 |
| H34me1                      | 80,514,894 | 50,337,160 | 51,058,776 | 63,614,983 | 72,150,721 | 53,278,934 | 58,929,878 |
| H3                          | 65,785,488 | 56,265,546 | 48,926,730 | 50,511,294 | 51,163,929 | 47,807,011 | 53,517,823 |
| <b>Mapping rate</b>         |            |            |            |            |            |            |            |
| H3K27ac                     | 76.50%     | 69.10%     | 77.00%     | 77.60%     | 74.70%     | 78.20%     | 78.70%     |
| H34me1                      | 74.40%     | 62.70%     | 78.60%     | 78.40%     | 74.60%     | 79.00%     | 79.40%     |
| H3                          | 70.30%     | 69.00%     | 73.00%     | 74.60%     | 67.20%     | 73.00%     | 75.90%     |

**Supplementary Table S4.** The numbers of eRNAs detected in each of the four cell types

|                                               | FT3-7   | Huh7.5  | PLC-PRF-5 | SNU182  |
|-----------------------------------------------|---------|---------|-----------|---------|
| <b>Histone marks ChIP-seq</b>                 |         |         |           |         |
| H3K4me1                                       | 308,558 | 234,525 | 294,164   | 233,037 |
| H3K27ac                                       | 64,868  | 255,525 | 212,855   | 74,913  |
| <b>Active enhancer regions</b>                |         |         |           |         |
| Total                                         | 26,889  | 55,306  | 50,553    | 27,284  |
| (Remove) TTS, TSS, exon<br>of protein coding  | 2,746   | 11,557  | 10,070    | 3,325   |
| Intergenic                                    | 8,650   | 15,641  | 14,618    | 6,576   |
| non-coding RNA                                | 15,493  | 28,108  | 25,865    | 17,383  |
| <b>Map RNA seq</b>                            |         |         |           |         |
| Total                                         | 505     | 1,162   | 1,383     | 597     |
| Antisense                                     | 158     | 397     | 464       | 209     |
| lincRNA                                       | 149     | 302     | 299       | 125     |
| Others                                        | 181     | 427     | 560       | 249     |
| (Remove) non eRNAs<br>:snoRNA,rRNA,tRNA, etc. | 17      | 36      | 60        | 14      |

**Supplementary Table S5. eRNAs commonly detected in four cell lines**

| Symbol           | Position                 | FANTOM | Symbol                 | Position                  | FANTOM |
|------------------|--------------------------|--------|------------------------|---------------------------|--------|
| <b>antisense</b> |                          |        | AC114763.1             | chr2:138418284-138501698  | 2      |
| AL513327.1       | chr1:33307348-33349245   | 3      | LINC01876              | chr2:156011530-156254950  | 2      |
| AL050341.2       | chr1:40256427-40257967   | .      | AC116049.2             | chr4:65998846-66150012    | 2      |
| AC105942.1       | chr1:94927566-94963270   | .      | LINC02163              | chr5:104079911-104105403  | .      |
| SLC16A1-AS1      | chr1:112956415-113047055 | 3      | LINC01843              | chr5:134506552-134509229  | .      |
| AC242426.2       | chr1:147172771-147211568 | .      | SNHG4                  | chr5:139274102-139283477  | .      |
| AL606537.1       | chr1:214028891-214030901 | .      | LINC01006              | chr7:156472196-156640654  | 7      |
| AL445524.1       | chr1:231522388-231528556 | .      | LINC00174              | chr7:66376044-66493566    | 1      |
| CCDC18-AS1       | chr1:93262186-93346025   | 2      | LINC-PINT              | chr7:130938963-131110176  | 23     |
| ATP1A1-AS1       | chr1:116392247-116418622 | .      | AC006001.3             | chr7:66526088-66592397    | 3      |
| ADAMTSL4-AS1     | chr1:150560202-150574552 | 1      | AF117829.1             | chr8:89609409-89757727    | 3      |
| PROX1-AS1        | chr1:213817751-213988508 | 2      | PVT1                   | chr8:127794533-128101253  | 35     |
| AC074117.1       | chr2:27356246-27367622   | .      | CASC19                 | chr8:127072694-127227541  | 23     |
| AC007388.1       | chr2:39436637-39665343   | 10     | LINC01515              | chr10:65570338-65768835   | .      |
| AC093110.1       | chr2:54661011-54680045   | 1      | OLMALINC               | chr10:100373513-100454043 | 1      |
| AC009303.2       | chr2:117995397-118055033 | 1      | RAB30-AS1              | chr11:83072066-83106719   | 1      |
| AC010976.1       | chr2:127455394-127514623 | 2      | AC025031.4             | chr12:46388856-46392126   | .      |
| AC007364.1       | chr2:149587196-149848233 | 3      | LINC02381              | chr12:54126098-54142493   | .      |
| AC007319.1       | chr2:187003220-187554663 | 12     | AC073569.2             | chr12:79690144-79778451   | 4      |
| PCBP1-AS1        | chr2:69962263-70103220   | 15     | AL139089.1             | chr13:52651305-52652279   | .      |
| THUMP3-AS1       | chr3:9349689-9398579     | 1      | LINC00355              | chr13:63986371-64076011   | 4      |
| AC099329.1       | chr3:42785087-42852428   | 2      | LINC02331              | chr14:53768942-53850882   | .      |
| AC068631.1       | chr3:186579476-186772986 | 1      | AL132989.2             | chr14:58288033-58289158   | .      |
| SGO1-AS1         | chr3:20174244-21145967   | 3      | AL355916.1             | chr14:61570540-61658696   | 17     |
| THR8-AS1         | chr3:24494087-24681711   | 2      | AC023906.3             | chr15:52116574-52122131   | .      |
| GLYCTK-AS1       | chr3:52288580-52299067   | .      | AC090825.1             | chr15:99807023-99877148   | .      |
| UBA6-AS1         | chr4:67701280-68080952   | 3      | LINC01578              | chr15:92882707-92899701   | .      |
| THAP9-AS1        | chr4:82893009-82900960   | .      | LINC01572              | chr16:72283301-72665009   | 3      |
| AL022068.1       | chr6:19324988-19839080   | 8      | AC005224.4             | chr17:14303854-14305505   | 1      |
| TRAF3IP2-AS1     | chr6:111483511-111598302 | 6      | LINC00511              | chr17:72323123-72640472   | 33     |
| AL034349.1       | chr6:128500527-128501176 | .      | LINC00261              | chr20:22547671-22578642   | 2      |
| AL356599.1       | chr6:145799409-145886585 | .      | AC073529.1             | chrX:10847877-11111141    | 1      |
| AC073332.1       | chr7:16970320-17299357   | 21     | <b>pseudogene</b>      |                           |        |
| HOXA-AS2         | chr7:27107777-27134302   | 3      | MST1L                  | chr1:16754910-16770237    | .      |
| AC005021.1       | chr7:95416108-95416462   | .      | EMBP1                  | chr1:121519112-121571892  | 1      |
| LINC01004        | chr7:104950315-105013044 | 10     | AC096921.1             | chr3:30626423-30626797    | .      |
| AC009403.1       | chr7:155611231-155645205 | .      | AC108693.1             | chr3:113740823-113741254  | .      |
| AC090739.1       | chr8:42537529-42538304   | .      | EMC3-AS1               | chr3:9986893-10006990     | .      |
| MIR181A2HG       | chr9:124658467-124698631 | 4      | LINC00888              | chr3:183447608-183456013  | .      |
| ENTPD1-AS1       | chr10:95753206-96090238  | 13     | AC132008.2             | chr3:197578213-197627906  | 1      |
| AP001107.9       | chr11:66347950-66364804  | 1      | CCT6P3                 | chr7:65038354-65074713    | .      |
| KCTD21-AS1       | chr11:78139771-78175323  | .      | STAG3L4                | chr7:67302621-67321526    | 1      |
| C1RL-AS1         | chr12:7108052-7122501    | .      | AC004980.1             | chr7:76549360-76627982    | .      |
| AC034102.6       | chr12:56120033-56129619  | .      | RPL13P5                | chr12:6873389-6884741     | .      |
| AC090673.1       | chr12:65851340-65882167  | .      | PLEKHA8P1              | chr12:45173064-45216041   | 1      |
| DLEU2            | chr13:49982552-50125720  | 8      | AC009533.1             | chr12:9277235-9313241     | .      |
| STARD13-AS       | chr13:33180401-33281584  | 9      | MRPS31P5               | chr13:52167709-52194465   | .      |
| PSMA3-AS1        | chr14:58265365-58298134  | 1      | AC104046.1             | chr15:85415228-85415633   | .      |
| USP3-AS1         | chr15:63544247-63601589  | 1      | UBE2Q2P2               | chr15:82355142-82420075   | .      |
| AC087482.1       | chr15:66984108-67065268  | 5      | UBE2Q2P1               | chr15:84526781-84571216   | .      |
| UBL7-AS1         | chr15:74461265-74481302  | .      | PDXDC2P                | chr16:70010751-70065945   | 1      |
| AC005921.2       | chr17:50693448-50695449  | .      | <b><sup>a</sup>SIN</b> |                           |        |
| COX10-AS1        | chr17:13756478-14069495  | 2      | AC096947.1             | chr1:61124733-61125202    | .      |
| AP005899.1       | chr18:9112404-9115877    | .      | THR8-IT1               | chr3:24455136-24459434    | .      |
| SNHG22           | chr18:49814023-49851059  | 1      | ST7-OT4                | chr7:116953899-117098806  | 4      |
| AC243964.2       | chr19:44632199-44718759  | 4      | AC090181.2             | chr15:77067654-77068325   | .      |
| SDCBP2-AS1       | chr20:1325405-1378734    | 6      | AC004832.4             | chr22:30421206-30421536   | .      |
| Z93930.2         | chr22:28800683-28848559  | 5      | <b><sup>b</sup>SON</b> |                           |        |
| TTC28-AS1        | chr22:27919376-28008581  | 1      | AC019080.1             | chr2:177283508-177392691  | 1      |
| AC231533.1       | chrX:48698963-48737163   | 2      | AC007066.2             | chr9:122937623-122940333  | .      |
| <b>lincRNA</b>   |                          |        | <b>Not assigned</b>    |                           |        |
| AL445686.2       | chr1:24538802-24556024   | 1      | DANCR                  | chr4:52712404-52720351    | .      |
| AL023755.1       | chr1:168400829-168495685 | 4      | Z94721.2               | chr6:166999405-167139141  | 11     |
| LINC01138        | chr1:148290889-148519604 | 4      | BMS1P4                 | chr10:73699151-73730487   | .      |
| CROCCP2          | chr1:16618253-16657232   | .      | AL137782.1             | chr13:75549773-75807120   | 9      |
| AC245100.4       | chr1:148402516-148432545 | .      | AC009022.1             | chr16:69976297-70065948   | 1      |
| AC009414.2       | chr2:36354749-36355114   | .      | AC068152.1             | chr17:46984045-47100323   | 1      |
| CYTOR            | chr2:87454781-87636740   | 3      | AC090181.3             | chr15:77063397-77064910   | .      |
| MIR4435-2HG      | chr2:111036776-111523376 | 11     | AL031009.1             | chr16:1688355-1690536     | .      |

<sup>a</sup>SIN: sense intronic ncRNA, <sup>b</sup>SON : sense overlapping ncRNA
